# Supplementary material
Source: PubMed Central journal article supplement (PMC5330622)
Supplement: NIHMS809338-supplement-supplement_1.pdf [file NIHMS809338-supplement-supplement_1.pdf]

| <b>Supplementary Table 1. Characteristics of the SAC Study population, stratified by whether FeNO was obtained</b> |                                |                              |                |
|--------------------------------------------------------------------------------------------------------------------|--------------------------------|------------------------------|----------------|
| <b>Variable</b>                                                                                                    | <b>Without FeNO<br/>(N=57)</b> | <b>With FeNO<br/>(N=131)</b> | <b>P Value</b> |
| Age (years)                                                                                                        | 6.7                            | 10.6                         | <0.001         |
| WBC                                                                                                                | 12.4                           | 12.0                         | 0.49           |
| Hb (g/dL)                                                                                                          | 8.2                            | 8.3                          | 0.53           |
| Reticulocyte (%)                                                                                                   | 11.2                           | 11.0                         | 0.80           |
| Eosinophil (median)                                                                                                | 2.5                            | 3.0                          | 0.87           |
| IgE (median)                                                                                                       | 69.6                           | 49.6                         | 0.60           |
| Male (%)                                                                                                           | 50.9                           | 55.0                         | 0.61           |
| Maternal history of asthma (%)                                                                                     | 23.2                           | 10.3                         | 0.02           |
| History of inhaled corticosteroid use (ever) (%)                                                                   | 14.0                           | 20.6                         | 0.29           |
| History of hydroxyurea use (ever) (%)                                                                              | 38.6                           | 32.8                         | 0.44           |
| History of wheezing leading to shortness of breath (%)                                                             | 28.1                           | 24.4                         | 0.60           |
| History of asthma (%)                                                                                              | 28.1                           | 29.0                         | 0.90           |
| Rate of ACS prior to baseline (median) (%)                                                                         | .20                            | .12                          | 0.10           |
| Rate of pain prior to baseline (median) (%)                                                                        | .14                            | .29                          | 0.03           |
| Prospective rate of ACS after baseline (median) (%)                                                                | .00                            | .00                          | 0.42           |
| Prospective rate of pain after baseline (median) (%)                                                               | .14                            | .49                          | <0.01          |

**Abbreviations:** SAC: Sleep and Asthma Cohort; FeNO: exhaled nitric oxide; FVC: forced vital capacity; FEV<sub>1</sub>=forced expiratory volume in 1 second; WBC=white blood cell count; Hb = hemoglobin; ACS=acute chest syndrome

**Supplementary Table 2. Associations between FeNO and Participant Characteristics, Stratified by Asthma Status**

| <b>Categorical variables</b>                                         |                               |            |                                |                           |                |                          |                            |            |                |
|----------------------------------------------------------------------|-------------------------------|------------|--------------------------------|---------------------------|----------------|--------------------------|----------------------------|------------|----------------|
|                                                                      | <b>All subjects<br/>N=131</b> |            |                                | <b>No Asthma<br/>N=93</b> |                |                          | <b>Has Asthma<br/>N=38</b> |            |                |
|                                                                      | <b>Median<br/>FeNO</b>        |            | <b>P<br/>value<sup>a</sup></b> | <b>Median<br/>FeNO</b>    |                | <b>P value</b>           | <b>Median<br/>FeNO</b>     |            | <b>P value</b> |
| <b>Covariate</b>                                                     | <b>No</b>                     | <b>Yes</b> |                                | <b>No</b>                 | <b>Yes</b>     |                          | <b>No</b>                  | <b>Yes</b> |                |
| Male gender                                                          | 8.4                           | 10.3       | 0.11                           | 8.3                       | 9.9            | 0.13                     | 8.6                        | 11.2       | 0.63           |
| Parent has asthma                                                    | 8.7                           | 10.6       | 0.14                           | 8.3                       | 11.8           | <0.05                    | 9.9                        | 8.7        | 0.65           |
| Participant has asthma                                               | 8.9                           | 9.9        | 0.60                           |                           |                |                          |                            |            |                |
| On hydroxyurea at the time of FeNO                                   | 8.7                           | 11.4       | 0.06                           | 8.7                       | 18.2           | 0.16                     | 9.2                        | 11.4       | 0.65           |
| On inhaled corticosteroids at the time of FeNO                       | 8.8                           | 11.7       | 0.25                           | 8.9                       | 8.4            | 0.62                     | 9.0                        | 17.4       | 0.05           |
| Has $\geq 12\%$ improvement in FEV <sub>1</sub> after bronchodilator | 9.0                           | 10.0       | 0.50                           | 9.0                       | 6.9            | 0.34                     | 9.0                        | 17.4       | 0.05           |
| Had 2 more positive skin tests (N=121)                               | 8.3                           | 12.4       | 0.001                          | 8.1                       | 11.8           | 0.01                     | 8.8                        | 12.6       | 0.03           |
| Wheeze with cold                                                     | 8.7                           | 10.0       | 0.22                           | 8.9                       | 8.2            | 0.98                     | 9.1                        | 11.4       | 0.28           |
| Wheeze without cold                                                  | 9.0                           | 10.4       | 0.30                           | 9.8                       | 7.8            | 0.14                     | 7.9                        | 12.5       | 0.07           |
| Wheeze with SOB                                                      | 9.0                           | 9.4        | 0.70                           | 8.9                       | 8.0            | 0.58                     | 8.4                        | 11.2       | 0.29           |
| Wheeze after exercise                                                | 8.9                           | 9.8        | 0.66                           | 9.4                       | 8.7            | 0.43                     | 11.8                       | 9.2        | 0.47           |
| Had an ACS event prior to 4 years of age                             | 9.8                           | 9.0        | 0.45                           | 8.1                       | 10.1           | 0.28                     | 13.3                       | 8.7        | 0.12           |
| Had a pain event prior to 4 years of age                             | 8.9                           | 9.6        | 0.95                           | 8.3                       | 9.9            | 0.13                     | 8.6                        | 11.2       | 0.63           |
| <b>Continuous Variables</b>                                          |                               |            |                                |                           |                |                          |                            |            |                |
|                                                                      | <b>All subjects</b>           |            |                                | <b>No Asthma</b>          |                | <b>Has Asthma</b>        |                            |            |                |
| <b>Covariate</b>                                                     | <b><math>\rho^b</math></b>    |            | <b>P value</b>                 | <b><math>\rho</math></b>  | <b>P value</b> | <b><math>\rho</math></b> | <b>P value</b>             |            |                |
| Age                                                                  | .28                           |            | 0.001                          | .27                       | 0.009          | .31                      | 0.06                       |            |                |

|                                          |      |        |      |       |      |       |
|------------------------------------------|------|--------|------|-------|------|-------|
| Height                                   | .34  | <0.001 | .30  | 0.004 | .43  | 0.007 |
| FEV <sub>1</sub> % predicted             | -.07 | 0.46   | -.10 | 0.33  | .02  | 0.89  |
| FVC% predicted                           | -.04 | 0.63   | -.11 | 0.31  | .07  | 0.67  |
| FEV <sub>1</sub> /FVC (actual)           | -.09 | 0.32   | -.01 | 0.90  | -.23 | 0.17  |
| FEV <sub>1</sub> /FVC (% predicted)      | .00  | 0.95   | .05  | 0.62  | -.08 | 0.65  |
| IgE                                      | .28  | 0.001  | .25  | 0.02  | .37  | 0.02  |
| Eosinophils, total no. of cells/cu.mm    | .20  | 0.02   | .18  | 0.08  | .23  | 0.17  |
| White blood cell count                   | -.08 | 0.35   | -.07 | 0.51  | -.11 | 0.51  |
| Hemoglobin (g/dL)                        | .02  | 0.84   | .15  | 0.16  | -.25 | 0.13  |
| Retrospective rate of ACS prior to FeNO  | -.03 | 0.78   | -.02 | 0.84  | -.17 | 0.32  |
| Retrospective rate of pain prior to FeNO | -.03 | 0.76   | .05  | 0.62  | -.18 | 0.27  |
| Prospective rate of ACS after FeNO       | .07  | 0.42   | .07  | 0.53  | .03  | 0.87  |
| Prospective rate of pain after FeNO      | .01  | 0.87   | -.02 | 0.82  | .04  | 0.79  |

**Abbreviations:** FeNO=exhaled nitric oxide; ppb=parts per billion; FVC=forced vital capacity; FEV<sub>1</sub>=forced expiratory volume in 1 second; ACS=acute chest syndrome

<sup>a</sup>Wilcoxon rank sum P value

<sup>b</sup>Spearman correlation coefficient

| <b>Supplementary Table 3. Multivariable model of factors associated with (ln)FeNO among children with SCA, stratified by asthma status</b> |                        |                |                        |                |
|--------------------------------------------------------------------------------------------------------------------------------------------|------------------------|----------------|------------------------|----------------|
| <b>Covariates</b>                                                                                                                          | <b>No Asthma</b>       |                | <b>Asthma</b>          |                |
|                                                                                                                                            | <b>β Estimate (SE)</b> | <b>P value</b> | <b>β Estimate (SE)</b> | <b>P value</b> |
| Male gender                                                                                                                                | 0.24 (0.13)            | 0.07           | -0.02 (0.23)           | 0.94           |
| White blood cell count                                                                                                                     | -0.02 (0.02)           | 0.15           | -0.03 (0.04)           | 0.50           |
| (ln) IgE                                                                                                                                   | 0.10 (0.04)            | 0.03           | 0.15 (0.07)            | 0.03           |
| Eosinophils<br>(quartile 1 = reference)                                                                                                    |                        |                |                        |                |
| Quartile 2                                                                                                                                 | 0.03 (0.17)            | 0.88           | -0.69 (0.35)           | 0.05           |
| Quartile 3                                                                                                                                 | 0.35 (0.19)            | 0.07           | -0.45 (0.27)           | 0.10           |
| Quartile 4                                                                                                                                 | 0.45 (0.18)            | 0.01           | -0.17 (0.34)           | 0.61           |
| History of wheezing that caused shortness of breath                                                                                        | -0.40 (0.18)           | 0.03           | 0.19 (0.24)            | 0.42           |

|                                     |              |      |              |      |
|-------------------------------------|--------------|------|--------------|------|
| ACS episode prior to 4 years of age | -0.07 (0.15) | 0.63 | -0.26 (0.20) | 0.22 |
|-------------------------------------|--------------|------|--------------|------|

**Abbreviations:** FeNO=exhaled nitric oxide; SCA= sickle cell anemia; SE=standard error; ACS=acute chest syndrome

**Supplementary Table 3. Multivariable model of prospective rates of ACS in Children with SCA, stratified by Asthma Status**

| Covariate                                       | No Asthma |           |         | Has Asthma |            |         |
|-------------------------------------------------|-----------|-----------|---------|------------|------------|---------|
|                                                 | IRR       | 95% CI    | P value | IRR        | 95% CI     | P value |
| ln (FeNO):                                      | 1.64      | 1.06-2.54 | 0.03    | 1.24       | 0.80-1.93  | 0.34    |
| Male gender                                     | 0.56      | 0.30-1.05 | 0.07    | 0.61       | 0.31-1.20  | 0.15    |
| History of wheezing causing shortness of breath | 2.42      | 1.06-5.49 | 0.04    | 2.02       | 1.13-3.62  | 0.02    |
| ACS episode prior to age 4 years                | 1.71      | 0.92-3.18 | 0.03    | 5.52       | 2.85-10.71 | <0.001  |

**Abbreviations:** ACS=acute chest syndrome ; SCA=sickle cell anemia; IRR=incidence rate ratio; CI=confidence interval; FeNO=exhaled nitric oxide; SCA= sickle cell anemia; SE=standard error;

<sup>a</sup>Negative Binomial regression models with adjustment for over-dispersion, using robust standard errors. Two-tailed significance values.
